# Supplementary material for: Conquering the Sahara and Arabian deserts: systematics and biogeography of Stenodactylus geckos (Reptilia: Gekkonidae)
Source: PubMed Central journal article supplement (PMC3582542; doi:10.1186/1471-2148-12-258), 2012-12-31

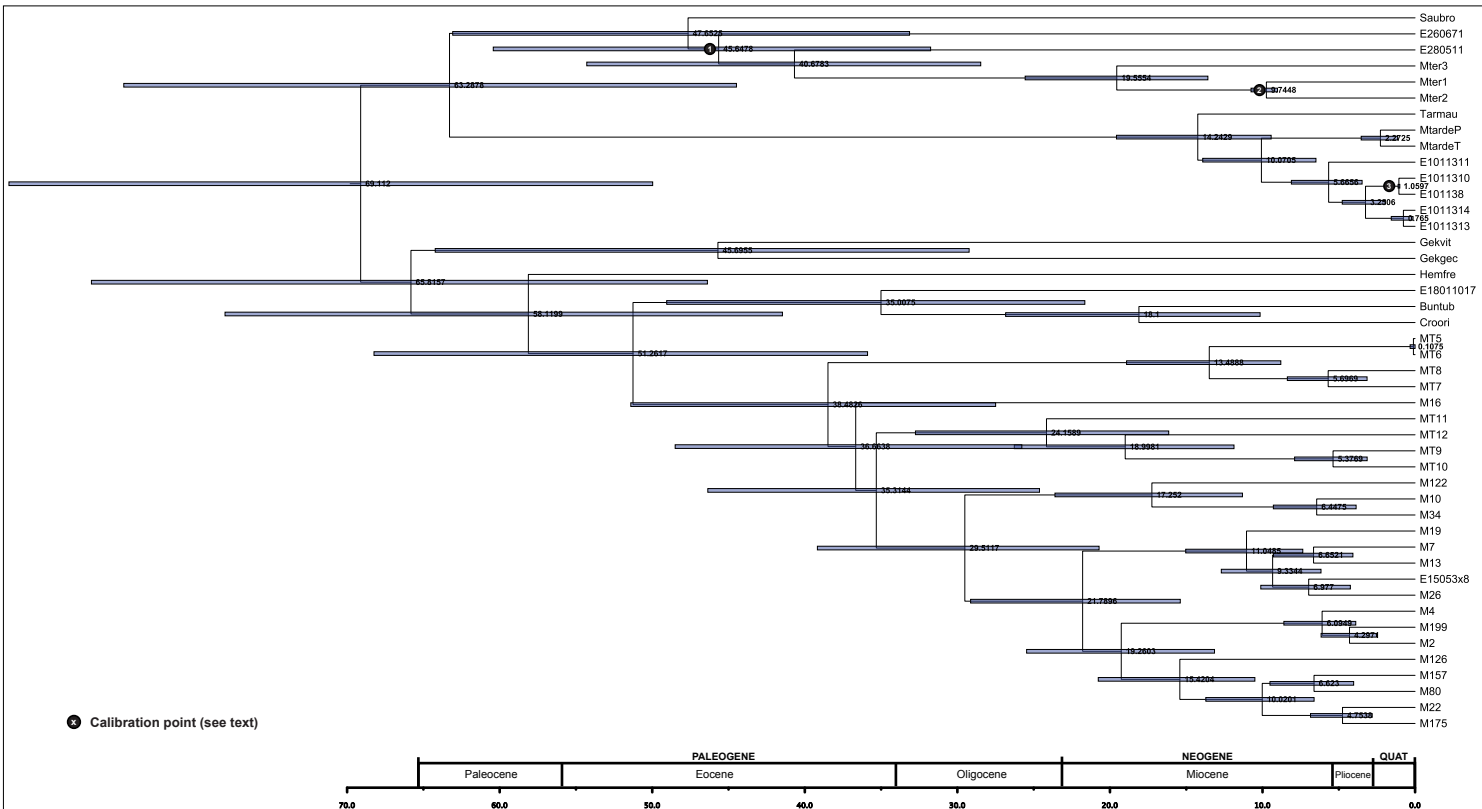

Supplement: 1471-2148-12-258-S4.pdf [file 1471-2148-12-258-S4.pdf]
